# Supplementary material for: Aberrant RhoA activation in macrophages increases senescence-associated secretory phenotypes and ectopic calcification in muscular dystrophic mice
Source: publisher site journal article supplement (doi:10.18632/aging.202413), 2020-12-23
Supplement: Supplementary file [file aging-v12i24-202413-supplementary-material-SD1.pdf]

## SUPPLEMENTARY FIGURES

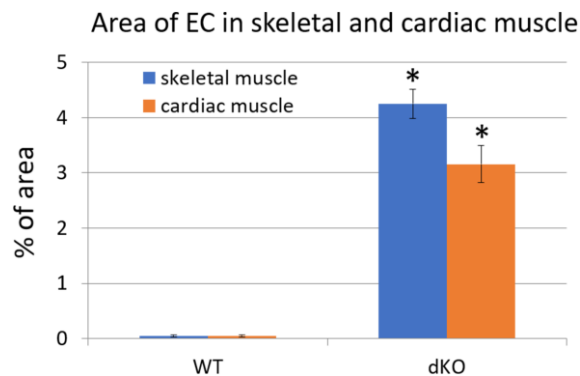

**Supplementary Figure 1. Ectopic calcification in skeletal muscle and cardiac muscle of WT and *dKO* mice.** Quantification of the area of ectopic calcification in skeletal muscle and cardiac muscle of WT and *dKO* mice. n=6 for both WT and *dKO* mice. “\*” indicates  $p < 0.05$ .

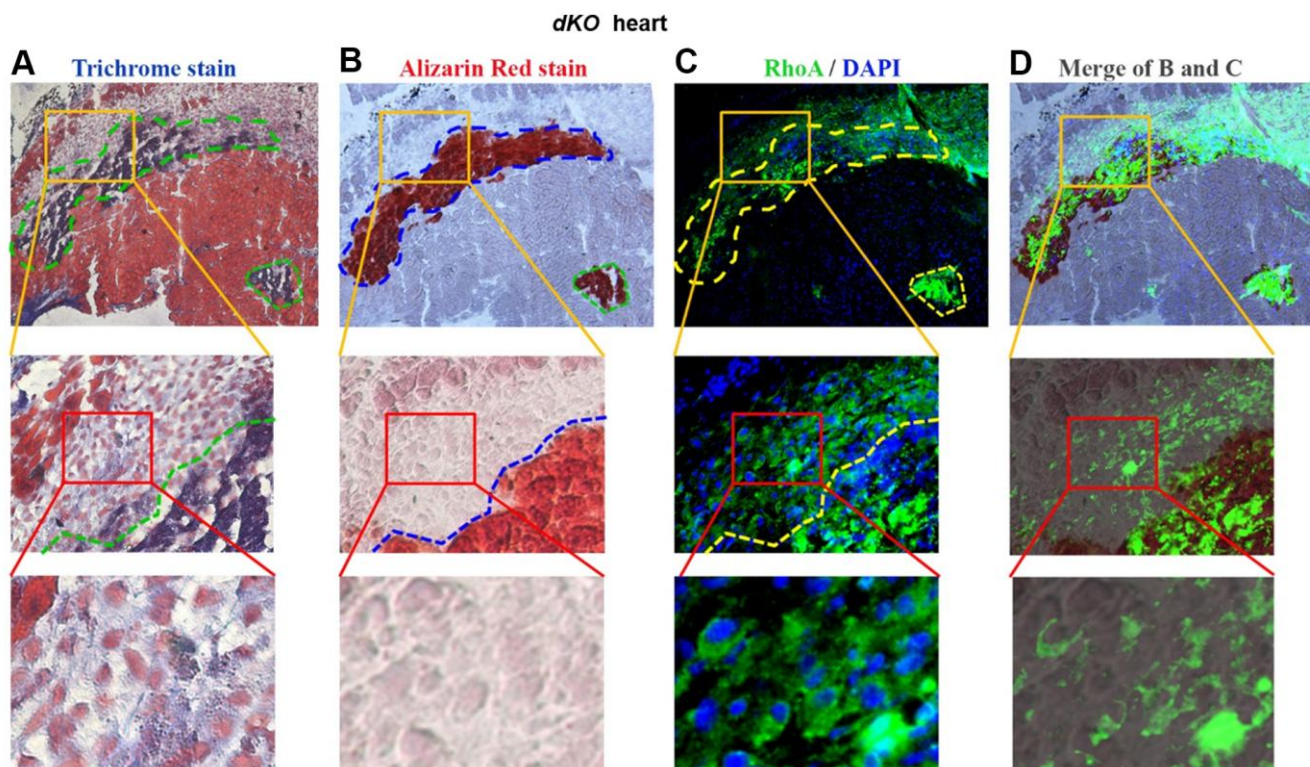

**Supplementary Figure 2. Increased accumulation of RhoA expressing cells in ectopic calcification sites in the hearts of *dKO* mice.** Trichrome staining (A), HE staining (B), and immunostaining of *dKO* heart section with RhoA antibody (C) showed the increased accumulation of RhoA+ cells at the sites of ectopic calcification. The merged images of B and C is shown in (D).

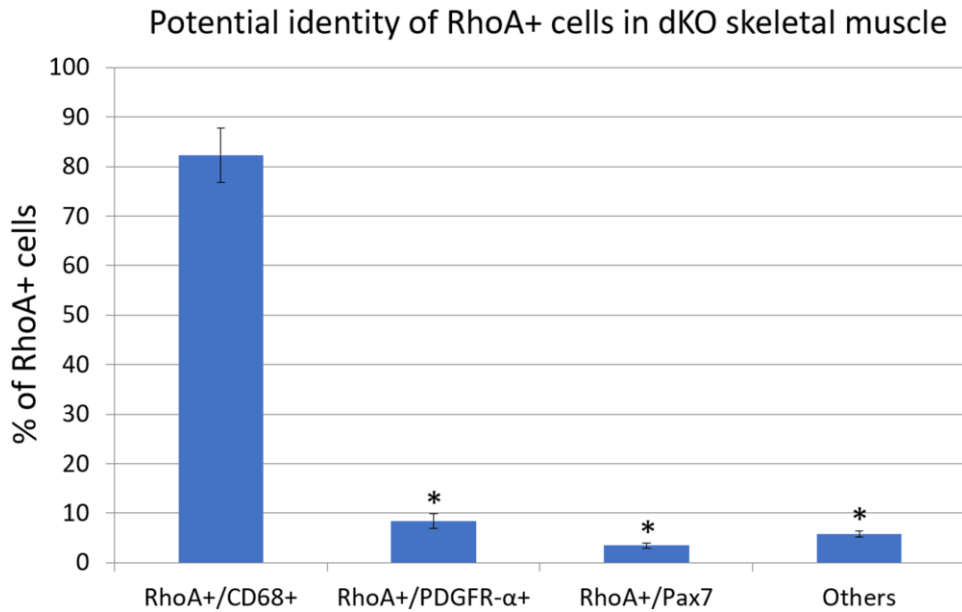

**Supplementary Figure 3. Identity of RhoA-expressing (RhoA+) cells in dKO skeletal muscle.** Quantification of the number of RhoA+ cells positive with CD68 (marker for macrophages), PDGFR- $\alpha$  (marker for mesenchymal stromal cells/MSCs), and Pax7 (marker for muscle progenitor cells). n=6 dKO mice (8-week old). “\*” indicates  $p < 0.05$ .

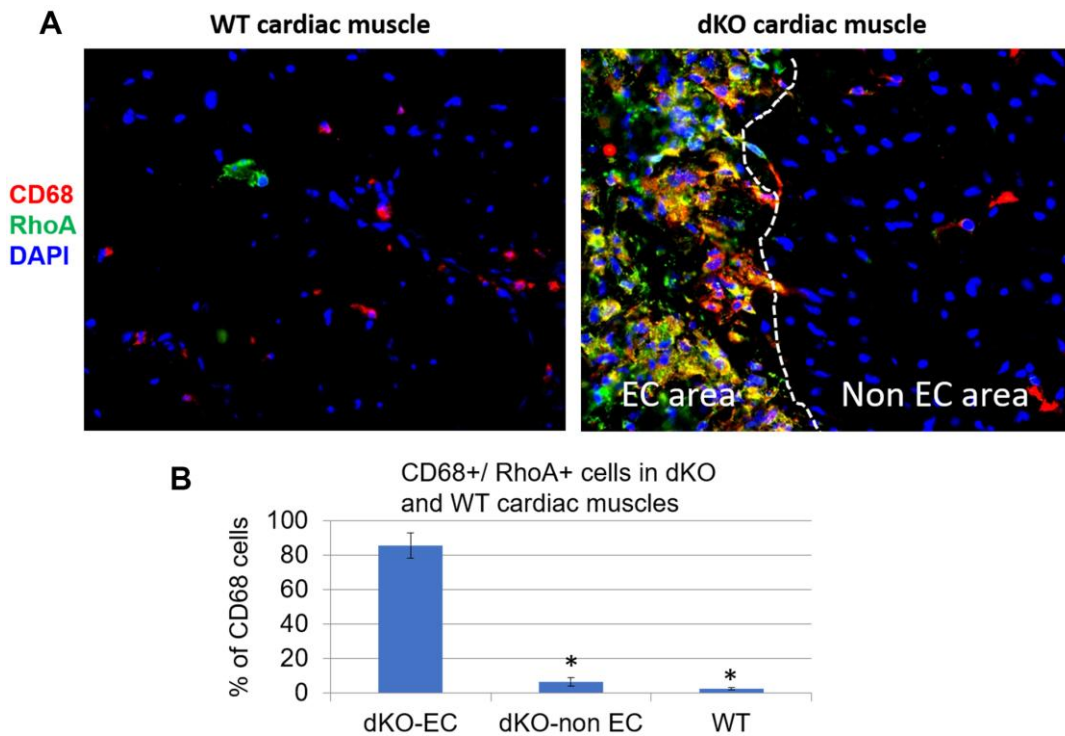

**Supplementary Figure 4. CD68+ cells at ectopic calcification sites are positive of RhoA expression.** (A) Immunostaining of CD68 and RhoA in the cardiac muscles of WT and dKO mice, showing whether CD68+ cells are positive with RhoA expression or not. (B) Quantification of the number of CD68+ cells positive of RhoA in dKO muscle with EC, dKO muscle without EC, and WT muscle.. n=6 for both WT and dKO mice. “\*” indicates  $p < 0.05$ .

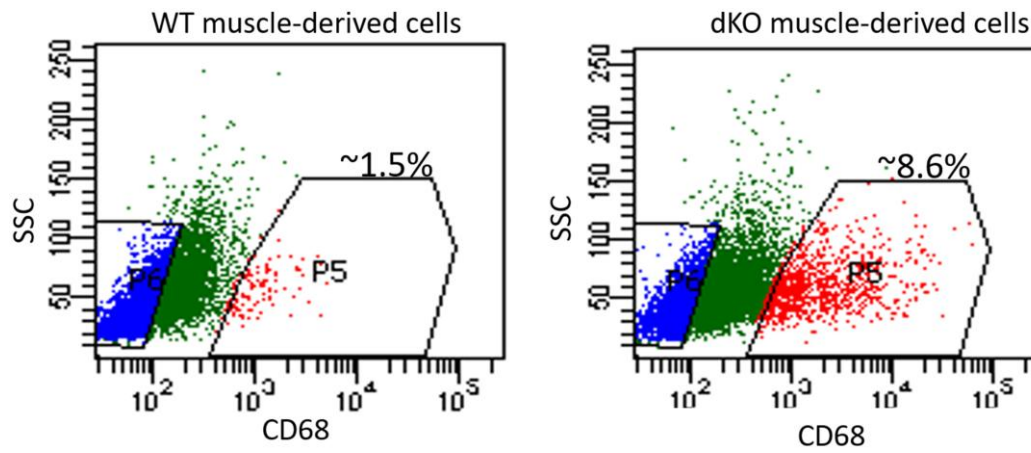

**Supplementary Figure 5. Sorting of CD68+ cells from muscle-derived cells of WT and dKO mice.** *Fluorescence activated cell sorting* (FACS) of CD68+ cells shows much higher number and ratio of CD68+ cells among all the muscle-derived cells from gastrocnemius muscle of dKO mice, compared to that of WT mice.

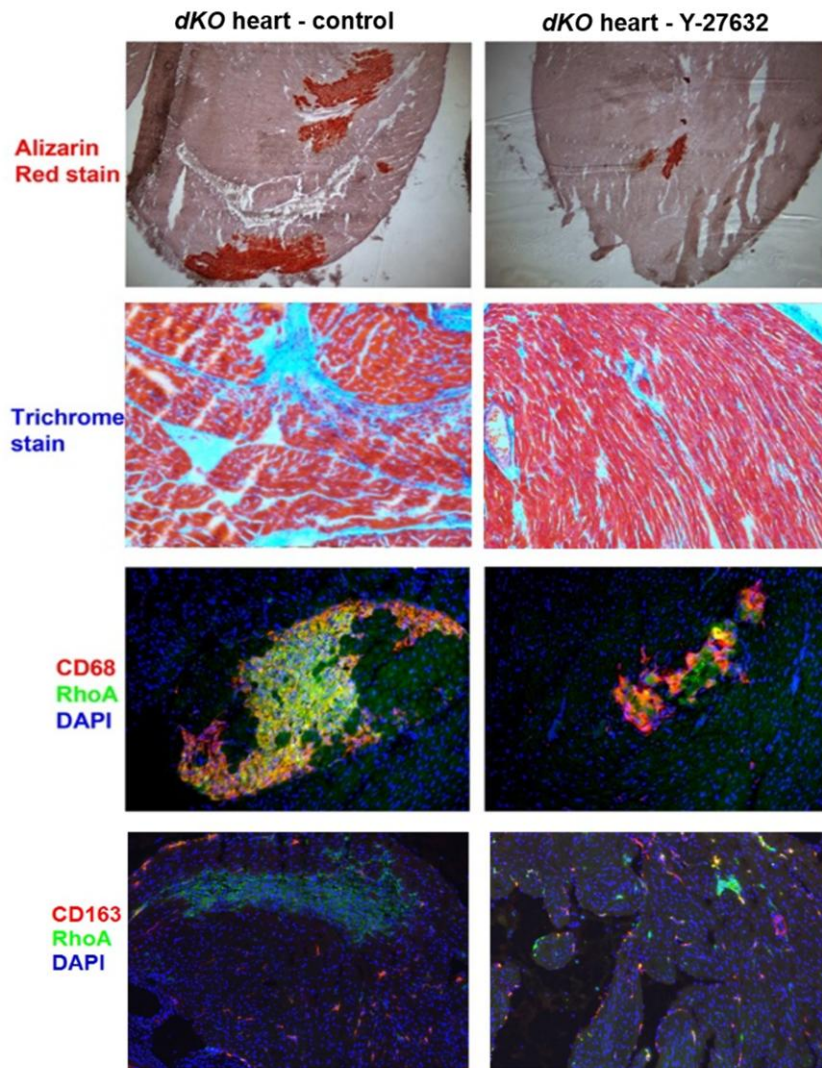

**Supplementary Figure 6. *In vivo* inhibition of RhoA/ROCK signaling in dKO mice improved dystrophic phenotypes in hearts.**

Alizarin Red staining showed reduced calcification in heart tissue with Y-27632 treatment. Trichrome staining showed reduced fibrosis formation in heart tissue with Y-27632 treatment. Immunostaining with CD68 and RhoA antibodies showed reduced number of CD68+/RhoA+ cells after Y-27632 treatment. Immunostaining of cardiac muscle with RhoA- and CD163-specific antibodies revealed that the ratio of CD163+ cells (M2 macrophage) to RhoA+ cells (mainly M1 macrophage) increased after Y27632 treatment, suggesting that the M1 to M2 phase transition of macrophages could have occurred in the Y-27632-treated dystrophic muscles.
